# Supplementary material for: Well exposed: exploring the chemical and microbial composition in well and municipal drinking waters in Iowa
Source: Royal Society of Chemistry journal article supplement (doi:10.1039/d5ew00216h), 2025-01-01
Supplement: d5ew00216h1.pdf [file d5ew00216h1.pdf]

Well Exposed Supplemental Information:

Table S1: Summary table of known Aquifer information

| Aquifer             |                                                                                                                                                                                                                                                                                                                                                                                                                                                                                                                                                                                                                                                                                                                                                                                                                                                                                     |
|---------------------|-------------------------------------------------------------------------------------------------------------------------------------------------------------------------------------------------------------------------------------------------------------------------------------------------------------------------------------------------------------------------------------------------------------------------------------------------------------------------------------------------------------------------------------------------------------------------------------------------------------------------------------------------------------------------------------------------------------------------------------------------------------------------------------------------------------------------------------------------------------------------------------|
| Alluvial            | The Apple-Plum Alluvial aquifer, an unconsolidated sand and gravel formation in the Apple-Plum watershed primarily serving the Dubuque area in eastern Iowa <sup>1,2</sup> , has an alluvial composition that allows for high permeability and water movement, making it a significant groundwater source. With depths ranging from approximately 50 to 250 <sup>2</sup> feet and a cumulative confining layer thickness of less than 25 feet <sup>3</sup> , the aquifer has minimal protection from surface contamination sources, such as agricultural runoff, chemical spills, and leaking underground storage tanks. The aquifer’s vulnerability is managed through rigorous treatment to maintain water quality for municipal use.                                                                                                                                             |
| Cambrian-Ordovician | The Cambrian-Ordovician aquifer is a main water source for municipalities in eastern half of Iowa <sup>4</sup> and is also commonly known as the Jordan Aquifer. Its bedrock is mainly comprised of sandstone with smaller portions of limestone and dolomite. Where the aquifer is deeper, there have been high levels of fluoride, chloride and sulfate dissolved minerals found along with excessive amounts of radium, but these are municipally removed in Iowa. This aquifer has low susceptibility to contamination due to its thick confining layers, which provide natural protection against surface pollutants, including contaminants from leaking underground storage tanks, chemical spills, and excessive fertilizer application <sup>5</sup> . Wells on the Cambrian-Ordovician aquifer can range from 300 to 2000 ft deep, with extremes reaching down to 3000 ft. |
| Silurian            | The Silurian aquifer serves many public, rural, and industrial users in eastern and northern Iowa. Its bedrock consists of dolomite and limestone, both primarily composed of calcium carbonate, with dolomite distinguished by the addition of magnesium <sup>6</sup> . This aquifer reaches depths of up to 700 feet in some areas, with wells typically ranging from 100 to 700 feet deep <sup>4</sup> . However, due to its shallow depth in certain locations and minimal protective overlying materials, the Silurian aquifer is highly susceptible to contamination <sup>7</sup> . This vulnerability exposes it to pollutants from surface sources, including leaking underground storage tanks, chemical spills, and excessive fertilizer application.                                                                                                                     |

|        |                                                                                                                                                                                                                                                                                                                                                                                                                                                                                                                                  |
|--------|----------------------------------------------------------------------------------------------------------------------------------------------------------------------------------------------------------------------------------------------------------------------------------------------------------------------------------------------------------------------------------------------------------------------------------------------------------------------------------------------------------------------------------|
| Galena | The Galena aquifer is one of the more restricted aquifer sources that is locally used in northeastern Iowa <sup>4</sup> . Although its exact depth isn't conclusive, it is known to be shallower than both the Silurian and the Cambrian-Ordovician aquifers. Its bedrock is comprised of shale with some embedded dolomite and limestone <sup>8</sup> . Uniquely, contamination from bacteria and nitrates are a concern for the Galena aquifer because portions of its strata are exposed in its eastern region <sup>4</sup> . |
|--------|----------------------------------------------------------------------------------------------------------------------------------------------------------------------------------------------------------------------------------------------------------------------------------------------------------------------------------------------------------------------------------------------------------------------------------------------------------------------------------------------------------------------------------|

Table S2: Summary table of known Municipal treatment information

| <b>Municipality</b>              | <b># of samples in municipality</b> |                                                                                                                                                                                                                                                                                                                    |
|----------------------------------|-------------------------------------|--------------------------------------------------------------------------------------------------------------------------------------------------------------------------------------------------------------------------------------------------------------------------------------------------------------------|
| 1. Asbury Municipal Water System | 1                                   | The Asbury Municipal System in Asbury, Iowa, sources its water from the Cambrian-Ordovician (Jordan) aquifer <sup>9</sup> and treats it using chlorination to achieve "breakpoint" chlorination, ensuring a minimum chlorine residual of 0.3 mg/L free chlorine or 1.5 mg/L total chlorine across the distribution |

|                                   |   |                                                                                                                                                                                                                                                                                                                                                                                                                                                                                                                                                                                                                                                                                                                                                                                                                                                                                                           |
|-----------------------------------|---|-----------------------------------------------------------------------------------------------------------------------------------------------------------------------------------------------------------------------------------------------------------------------------------------------------------------------------------------------------------------------------------------------------------------------------------------------------------------------------------------------------------------------------------------------------------------------------------------------------------------------------------------------------------------------------------------------------------------------------------------------------------------------------------------------------------------------------------------------------------------------------------------------------------|
|                                   |   | system <sup>10</sup> . This treatment process, overseen by the Iowa Department of Natural Resources (IDNR), maintains water safety for public consumption.                                                                                                                                                                                                                                                                                                                                                                                                                                                                                                                                                                                                                                                                                                                                                |
| 2. Cascade Municipal Water Supply | 1 | The Cascade Municipal Water Supply in Iowa sources its water from the Cambrian-Ordovician aquifer <sup>11</sup> , specifically the Jordan Sandstone and Silurian Limestone formations, which offer natural protection against surface contaminants. The wells have a combined daily capacity of approximately 1,440,000 gallons. The system includes three well houses, a 400,000-gallon water tower, and 12 miles of underground distribution lines, with an average daily consumption of about 230,000 gallons <sup>12</sup> . Cascade employs chlorination with a Maximum Residual Disinfectant Level (MRDL) of 4.0 ppm. In 2023, the Running Annual Average (RAA) chlorine residual in the system is 2.3 ppm, within a range of 1.53 to 3.1 ppm <sup>13</sup> . The Iowa Department of Natural Resources (IDNR) oversees the water quality, ensuring it meets all state and federal safety standards. |
| 3. Dubuque Water Works            | 6 | The City of Dubuque sources its water from the Apple-Plum Alluvial aquifer and the Jordan (Cambrian-Ordovician) aquifer <sup>14,15</sup> . To ensure water safety, Dubuque employs chlorination for disinfection, maintaining microbiological safety by destroying pathogens, with a Maximum Residual Disinfectant Level (MRDL) of 4.0 ppm and a Running Annual Average (RAA) chlorine residual of 1.1 ppm <sup>16</sup> . Additionally, fluoride is detected at 0.7 mg/L in the treated water – this concentration results from a combination of added fluoride to promote dental health, natural erosion of deposits. Phosphate is introduced to chemically stabilize the water, reducing lead leaching from pipes <sup>16</sup> . The Iowa Department of Natural Resources (IDNR) oversees the water quality, ensuring adherence to all safety standards.                                              |
| 4. Dyersville Municipal Water Co  | 3 | The Dyersville water supply in Iowa draws from the Cambrian-Ordovician and Silurian aquifers, which consist of sandstone and dolomite rock layers <sup>16</sup> . To ensure safe drinking water, Dyersville uses chlorination for disinfection, maintaining a Maximum Residual Disinfectant Level (MRDL) of 4.0 ppm and a Running Annual Average (RAA) chlorine residual of 1.8 ppm, with levels ranging from 1.1                                                                                                                                                                                                                                                                                                                                                                                                                                                                                         |

|                            |   |                                                                                                                                                                                                                                                                                                                                                                                                                                                                                                                                                                                                                  |
|----------------------------|---|------------------------------------------------------------------------------------------------------------------------------------------------------------------------------------------------------------------------------------------------------------------------------------------------------------------------------------------------------------------------------------------------------------------------------------------------------------------------------------------------------------------------------------------------------------------------------------------------------------------|
|                            |   | to 1.95 ppm <sup>17</sup> . Fluoride was detected at a level of 0.9 ppm in the water, a concentration that results from a combination of added fluoride to promote dental health, natural erosion of deposits, and possible discharge from fertilizer and aluminum factories <sup>17</sup> . Additionally, sodium was measured at 26.1 ppm, originating both from the natural erosion of deposits and from additives introduced during the treatment process <sup>17</sup> . The Iowa Department of Natural Resources (IDNR) oversees the water quality, ensuring compliance with all required safety standards. |
| 5. Epworth Water Supply    | 2 | The Epworth Water Supply in Iowa sources its water from the Silurian aquifer <sup>18</sup> , specifically from dolomite formations <sup>7</sup> . Epworth employs chlorination for disinfection to maintain microbiological safety, with a Maximum Residual Disinfectant Level (MRDL) of 4.0 ppm and a Running Annual Average (RAA) chlorine residual reported to ensure consistent disinfection compliance <sup>7</sup> . The Epworth water system is overseen by the IDNR, which ensures adherence to water quality standards.                                                                                 |
| 6. Farley Water Supply     | 1 | The Farley Water Supply in Iowa sources its water from the sandstone and dolomite of the Cambrian-Ordovician aquifer <sup>19,20</sup> . Farley uses chlorination as its primary disinfection method to control microbes in the water, maintaining a Maximum Residual Disinfectant Level (MRDL) of 4.0 ppm. In 2020, the system reported a Running Annual Average (RAA) chlorine residual of 1.8 ppm, with recorded values ranging from 1.33 to 2.16 ppm <sup>19</sup> . The Iowa Department of Natural Resources (IDNR) oversees the water quality, ensuring adherence to safety and compliance standards.       |
| 7. Holy Cross Water Supply | 1 | The Holy Cross Water Supply in Iowa sources its water from the Cambrian-Ordovician aquifer <sup>21</sup> .                                                                                                                                                                                                                                                                                                                                                                                                                                                                                                       |
| 8. Luxemburg Water Supply  | 1 | The City of Luxemburg water supply in Iowa sources its water from the Cambrian Jordan Sandstone aquifer <sup>22</sup> . This aquifer is not susceptible to contamination due to its depth and protective overlying materials, which prevent contaminants from easily accessing the water source. The Luxemburg water                                                                                                                                                                                                                                                                                             |

|                              |   |                                                                                                                                                                                                                                                                                                                                                                                                                                                                                                                                                                                                                                                                                                                                                                                                                                                                                                                             |
|------------------------------|---|-----------------------------------------------------------------------------------------------------------------------------------------------------------------------------------------------------------------------------------------------------------------------------------------------------------------------------------------------------------------------------------------------------------------------------------------------------------------------------------------------------------------------------------------------------------------------------------------------------------------------------------------------------------------------------------------------------------------------------------------------------------------------------------------------------------------------------------------------------------------------------------------------------------------------------|
|                              |   | supply employs chlorination as its primary disinfection method to control microbial growth, maintaining a Maximum Residual Disinfectant Level (MRDL) of 4.0 ppm and a Running Annual Average (RAA) chlorine residual of 1.66 ppm, with levels ranging between 1.00 and 2.24 ppm <sup>23</sup> . The Iowa Department of Natural Resources (IDNR) oversees the water quality, ensuring compliance with all safety standards.                                                                                                                                                                                                                                                                                                                                                                                                                                                                                                  |
| 9. New Vienna Water Supply   | 1 | The New Vienna Water Supply in Iowa sources its water from the Silurian and Cambrian-Ordovician aquifers <sup>24</sup> .                                                                                                                                                                                                                                                                                                                                                                                                                                                                                                                                                                                                                                                                                                                                                                                                    |
| 10. Peosta Water Supply      | 2 | The Peosta water supply in Iowa sources its water from the Cambrian-Ordovician aquifer, specifically from sandstone and dolomite formations <sup>25</sup> . Peosta uses chlorination as a primary disinfection method, maintaining a Maximum Residual Disinfectant Level (MRDL) of 4.0 ppm and a Running Annual Average (RAA) chlorine residual of 0.8 ppm, with recorded levels ranging from 0.33 to 1.6 ppm <sup>26</sup> . Fluoride was detected at 0.5 ppm, reflecting a combination of added fluoride to support dental health, natural erosion of deposits, and possible discharge from fertilizer and aluminum factories <sup>26</sup> . Additionally, sodium levels measured at 85.8 ppm stem from both natural deposits and additives used during the treatment process <sup>26</sup> . The Iowa Department of Natural Resources (IDNR) oversees the water quality to ensure compliance with all safety standards. |
| 11. Worthington Water Supply | 1 | The Worthington water supply in Iowa sources its water from the Cambrian-Ordovician aquifer, specifically from sandstone and dolomite formations <sup>27</sup> . Chlorination is used as the primary disinfection method, with a Maximum Residual Disinfectant Level (MRDL) of 4.0 ppm and a Running Annual Average (RAA) chlorine residual of 1.0 ppm, ranging from 0.4 to 2.15 ppm, to control microbial growth <sup>28</sup> . Fluoride was detected at 1.6 ppm, sourced from a combination of added fluoride to promote dental health, natural erosion of deposits, and potential discharge from fertilizer and aluminum factories <sup>28</sup> . Additionally, sodium levels were measured at 50.6 ppm, stemming from both the natural erosion of deposits and additives introduced during the treatment process. The Iowa                                                                                            |

|  |  |                                                                                                                   |
|--|--|-------------------------------------------------------------------------------------------------------------------|
|  |  | Department of Natural Resources (IDNR) oversees the water quality to ensure compliance with all safety standards. |
|--|--|-------------------------------------------------------------------------------------------------------------------|

Table S3: List of 33 water quality indicators/ Chemical parameters, Minimum Detection level (MDL), SWDA regulatory level (if applicable)

| <b>Water Quality Indicator/ Parameter</b> | <b>Minimum Detection Level</b> | <b>Water Quality Indicator/ Parameter</b> | <b>Minimum Detection Level</b> |
|-------------------------------------------|--------------------------------|-------------------------------------------|--------------------------------|
| Aluminum                                  | 2.5144 ppb                     | Nickel                                    | 0.0508 ppb                     |
| Antimony                                  | 0.0145 ppb                     | Nitrate (as N)                            | 0.10 ppm                       |
| Arsenic                                   | 0.0067 ppb                     | Phosphorus                                | 3.7141 ppb                     |
| Barium                                    | 0.0145 ppb                     | Potassium                                 | 0.0045 ppm                     |
| Beryllium                                 | 0.0123 ppb                     | Selenium                                  | 0.2816 ppb                     |
| Boron                                     | 0.7030 ppb                     | Sodium                                    | 0.0176 ppm                     |
| Cadmium                                   | 0.0103 ppb                     | Strontium                                 | 0.0777 ppb                     |
| Calcium                                   | 0.0079 ppm                     | Thallium                                  | 0.0036 ppb                     |
| Chromium                                  | 0.0173 ppb                     | Tin                                       | 0.0145 ppb                     |
| Cobalt                                    | 0.0021 ppb                     | Uranium                                   | 0.0006 ppb                     |
| Copper                                    | 0.2251 ppb                     | Vanadium                                  | 0.0039 ppb                     |
| Iron                                      | 0.2259 ppb                     | Zinc                                      | 0.4222 ppb                     |

|            |            |                |                   |
|------------|------------|----------------|-------------------|
| Lead       | 0.0106 ppb |                |                   |
| Lithium    | 0.0608 ppb | E-coli         | Presence/ Absence |
| Magnesium  | 0.0016 ppm | Total Coliform | Presence/ Absence |
| Manganese  | 0.0166 ppb | Temperature    | -5 °C             |
| Molybdenum | 0.0017 ppb | pH             | 0                 |

Table S4: Descriptive statistics and detection frequencies of chemicals listed on the EPA's Primary Drinking Water Regulations list in well and municipal drinking water samples

| Well Samples | Municipal Samples |
|--------------|-------------------|
|--------------|-------------------|

| Parameter       | Mean   | Median | Range             | Detection Frequency | Mean  | Median | Range             | Detection Frequency | Higher Source | p_value   |
|-----------------|--------|--------|-------------------|---------------------|-------|--------|-------------------|---------------------|---------------|-----------|
| Antimony (ppb)  | 0.203  | 0.01   | 0.0145 - 0.0477   | 100%                | 0.02  | 0.01   | 0.0145 - 0.0463   | 100%                | Municipal     | 0.4488    |
| Arsenic (ppb)   | 0.073  | 0.06   | 0.0048 - 0.1626   | 100%                | 0.20  | 0.10   | 0.0121 - 0.8262   | 100%                | Municipal     | 0.1404    |
| Barium (ppb)    | 82.135 | 63.77  | 0.0463 - 233.6834 | 100%                | 27.92 | 15.87  | 0.2379 - 161.9626 | 100%                | Well          | 0.1636    |
| Beryllium (ppb) | 0.017  | 0.02   | 0.0123 - 0.044    | 100%                | 0.02  | 0.01   | 0.0123 - 0.0262   | 100%                | Well          | 0.7455    |
| Cadmium (ppb)   | 0.015  | 0.01   | 0.0103 - 0.0814   | 95%                 | 0.01  | 0.01   | 0.0103 - 0.0211   | 90%                 | Well          | 0.3539    |
| Copper (ppb)    | 8.911  | 5.59   | 0.2 - 35.833      | 100%                | 29.52 | 15.19  | 2.002 - 117.488   | 100%                | Municipal     | 0.0337*   |
| Lead (ppb)      | 0.203  | 0.12   | 0.0315 - 0.7772   | 100%                | 0.18  | 0.08   | 0.013 - 1.3651    | 100%                | Well          | 0.1264    |
| Nitrate (ppm)   | 4.054  | 1.80   | 0.24 - 11         | 55%                 | 1.46  | 0.64   | 0.54 - 4.8        | 50%                 | Well          | 0.3911    |
| Selenium (ppb)  | 0.497  | 0.28   | 0.2816 - 1.3121   | 70%                 | 0.28  | 0.41   | 0.2816 - 1.154    | 60%                 | Well          | 0.3674    |
| Thallium (ppb)  | 0.022  | 0.02   | 0.0053 - 0.095    | 100%                | 0.01  | 0.01   | 0.0049 - 0.0251   | 100%                | Well          | 0.0019*** |
| Uranium (ppb)   | 0.285  | 0.09   | 0.0098 - 1.1119   | 100%                | 0.28  | 0.23   | 0.009 - 0.832     | 100%                | Well          | 0.9461    |

Table S5: Descriptive statistics and detection frequencies of chemicals listed on the EPA's Secondary Drinking Water Standards in well and municipal drinking water samples.

| Well Samples | Municipal Samples |
|--------------|-------------------|
|--------------|-------------------|



| Parameter       | Mean    | Median | Range           | Detection Frequency | Mean  | Median | Range           | Detection Frequency | Higher Source | p_value   |
|-----------------|---------|--------|-----------------|---------------------|-------|--------|-----------------|---------------------|---------------|-----------|
| Aluminum (ppb)  | 3.370   | 2.51   | 2.514 - 14.152  | 90%                 | 9.88  | 2.64   | 2.514 - 82.337  | 95%                 | Municipal     | 0.0140*   |
| Iron (ppb)      | 159.489 | 68.53  | 6.125 - 1035.82 | 100%                | 36.32 | 31.04  | 4.1273 - 89.170 | 100%                | Well          | 0.0360**  |
| Manganese (ppb) | 10.252  | 2.74   | 0.0166 - 90.005 | 100%                | 1.00  | 0.68   | 0.187 - 4.4723  | 100%                | Well          | 0.0060*** |
| Zinc (ppb)      | 13.694  | 8.65   | 0.4222 - 51.847 | 100%                | 7.28  | 3.37   | 0.4222 - 49.902 | 100%                | Well          | 0.0337**  |

Table S6: Descriptive statistics and detection frequencies of non-EPA regulated chemicals tested in well and municipal drinking water samples.

| Parameter        | Well Samples |        |                  |                     | Municipal Samples |        |                   |                     | Higher Source | p_value   |
|------------------|--------------|--------|------------------|---------------------|-------------------|--------|-------------------|---------------------|---------------|-----------|
|                  | Mean         | Median | Range            | Detection Frequency | Mean              | Median | Range             | Detection Frequency |               |           |
| Boron (ppb)      | 23.935       | 18.25  | 6.624 - 73.532   | 100%                | 227.12            | 131.56 | 12.177 - 911.05   | 100%                | Municipal     | 0.0009*** |
| Calcium (ppm)    | 47.611       | 58.53  | 0.044 - 124.695  | 100%                | 31.26             | 12.74  | 0.182 - 112.195   | 100%                | Well          | 0.2503    |
| Chromium (ppb)   | 0.477        | 0.33   | 0.0405 - 1.686   | 100%                | 0.39              | 0.35   | 0.0798 - 0.703    | 100%                | Well          | 0.8181    |
| Cobalt (ppb)     | 0.114        | 0.12   | 0.0109 - 0.2925  | 100%                | 0.08              | 0.06   | 0.0105 - 0.2574   | 100%                | Well          | 0.2616    |
| Lithium (ppb)    | 3.205        | 2.79   | 0.487 - 7.451    | 100%                | 30.63             | 18.25  | 0.288 - 129.604   | 100%                | Municipal     | 0.0003*** |
| Magnesium (ppm)  | 22.216       | 26.92  | 0.0201 - 57.669  | 95%                 | 17.50             | 20.45  | 0.077 - 42.315    | 90%                 | Well          | 0.3104    |
| Molybdenum (ppb) | 0.425        | 0.28   | 0.0296 - 1.2182  | 95%                 | 0.27              | 0.25   | 0.0155 - 0.661    | 100%                | Well          | 0.1559    |
| Nickel (ppb)     | 0.871        | 0.87   | 0.1007 - 3.6901  | 100%                | 0.51              | 0.35   | 0.0768 - 1.6686   | 100%                | Well          | 0.0617    |
| Phosphorus (ppb) | 11.819       | 6.41   | 3.714 - 55.762   | 70%                 | 439.28            | 494.37 | 3.714 - 1555.63   | 60%                 | Municipal     | 0.0000*** |
| Potassium (ppm)  | 1.142        | 1.06   | 0.1259 - 4.877   | 100%                | 5.38              | 5.37   | 0.257 - 13.595    | 100%                | Municipal     | 0.0000*** |
| Sodium (ppm)     | 51.578       | 9.94   | 1.807 - 179.140  | 100%                | 67.19             | 43.29  | 12.57 - 197.249   | 100%                | Municipal     | 0.0411*   |
| Strontium (ppb)  | 65.763       | 62.42  | 0.2604 - 180.442 | 100%                | 383.53            | 54.38  | 0.2345 - 1371.643 | 100%                | Municipal     | 0.1478    |
| Tin (ppb)        | 0.024        | 0.01   | 0.0145 - 0.1     | 45%                 | 0.01              | 0.01   | 0.0145            | 40%                 | Well          | 0.4094    |

|                |       |      |                 |      |      |      |                 |      |           |           |
|----------------|-------|------|-----------------|------|------|------|-----------------|------|-----------|-----------|
| Vanadium (ppb) | 0.040 | 0.01 | 0.0044 - 0.3002 | 100% | 0.10 | 0.03 | 0.0039 - 0.3282 | 100% | Municipal | 0.0043*** |
|----------------|-------|------|-----------------|------|------|------|-----------------|------|-----------|-----------|

Table S7: Module list of functional traits relating to phosphate or nitrogen metabolism.

| <u>BugBase Module ID</u> | <u>Module Name</u>                                             |
|--------------------------|----------------------------------------------------------------|
| M00145                   | NADPH Quinone Oxidoreductase in Chloroplasts and Cyanobacteria |
| M00175                   | Nitrogen Fixation: Nitrogen-Ammonia                            |
| M00222                   | Phosphate Transport System                                     |
| M00434                   | PhoRB Phosphate Starvation Response                            |
| M00438                   | Nitrate-Nitrite Transport System                               |
| M00443                   | SenX3-RegX3 Phosphate Starvation Response                      |
| M00449                   | CreBC Phosphate Regulation                                     |
| M00473                   | UhpBA Hexose Phosphate Uptake                                  |
| M00497                   | GlnLG Nitrogen Regulation                                      |
| M00498                   | NtrYX Nitrogen Regulation                                      |
| M00524                   | FixLJ Nitrogen Fixation                                        |
| M00528                   | Ammonia-Nitrite Nitrification                                  |
| M00529                   | Nitrate-Nitrogen Denitrification                               |
| M00530                   | Dissimilatory Nitrate Reduction: Nitrate-Ammonia               |
| M00531                   | Assimilatory Nitrate Reduction: Nitrate-Ammonia                |
| M00176                   | Sulfur-Sulfate Reduction                                       |

Table S8: ddPCR assay thresholds, LOD, and LOQ

| <u>Target taxa (gene)</u> | <u>ddPCR Threshold</u> | <u>Limit of Detection</u> | <u>Limit of Quantification</u> |
|---------------------------|------------------------|---------------------------|--------------------------------|
| Total Bacteria            | 12900                  | 5.3 gene copies / 20 µL   | 53 gene copies / 20 µL         |
| <i>L. pneumophila</i>     | 8800                   | 6.08 gene copies / 20 µL  | 6.08 gene copies / 20 µL       |

NTM

10600

5.6 gene copies / 20 µL

5.6 gene copies / 20 µL

*Thresholds were determined experimentally by spiking target taxa's gblock at different concentrations into water DNA matrix and adjusting threshold until expected concentration was read out.*

#### Bibliography:

- 1 City of Dubuque Water Department, *2023 Water Quality Consumer Confidence Report*, <https://www.cityofdubuque.org/DocumentCenter/View/54579/2023-Water-Quality-Consumer-Confidence-Report>, (accessed 5 November 2024)

- 2 City of Dubuque Water Department, *2024 Water Quality Consumer Confidence Report*, <https://www.cityofdubuque.org/DocumentCenter/View/57044/2024-Water-Quality-Consumer-Confidence-Report>, (accessed 5 November 2024).
- 3 City of Dubuque Water Department, *Source Water Assessment for Dubuque*, <https://www.cityofdubuque.org/DocumentCenter/View/17944/Source-Water-Assessment-for-Dubuque>, (accessed 5 November 2024).
- 4 J. C. Prior et al, *Iowa's Groundwater Basics*, 1st edition., 2003.
- 5 *Scientific Investigations Report*, 2012.
- 6 C. M. Sperber, B. H. Wilkinson and D. R. Peacor, Rock Composition, Dolomite Stoichiometry, and Rock/Water Reactions in Dolomitic Carbonate Rocks, *The Journal of Geology*, 1984, **92**, 609–622.
- 7 U.S. Geological Survey, *Hydrology of the Cambrian-Ordovician Aquifer System in the Northern Midwest, United States*, [https://pubs.usgs.gov/ha/ha730/ch\\_j/J-text6.html](https://pubs.usgs.gov/ha/ha730/ch_j/J-text6.html), (accessed 5 November 2024).
- 8 R. D. Rowden and R. D. Libra, A Report of The Big Spring Basin Demonstration Project.
- 9 Source Water Protection Tracker - Asbury, <https://programs.iowadnr.gov/sourcewater/SystemDetail?pwsid=3102001>, (accessed 5 November 2024).
- 10 Water System User Information, [https://www.cityofasbury.com/departments/water/water\\_system\\_user\\_information](https://www.cityofasbury.com/departments/water/water_system_user_information), (accessed 5 November 2024).
- 11 Source Water Protection Tracker - Cascade, <https://programs.iowadnr.gov/sourcewater/SystemDetail?pwsid=3118080>, (accessed 5 November 2024).
- 12 City of Cascade - Water, <https://www.cityofcascade.org/vnews/display.v/SEC/Municipal%20Utilities%7CWater>, (accessed 5 November 2024).
- 13 City of Cascade Water Department, *Cascade Water Quality Report*, <https://www.cityofcascade.org/vimages/shared/vnews/stories/5eeb92cca75d4/Cascade%20Water%20Quality%20Report.pdf>, (accessed 5 November 2024).
- 14 City of Dubuque Water Department, *2019 Water Quality Consumer Confidence Report*, <https://www.cityofdubuque.org/2019waterquality>, (accessed 5 November 2024).
- 15 Source Water Protection Tracker - Dubuque, <https://programs.iowadnr.gov/sourcewater/SystemDetail?pwsid=3126052>, (accessed 5 November 2024).
- 16 Treatment Process | Dubuque, IA - Official Website, <https://www.cityofdubuque.org/522/Treatment-Process>, (accessed 5 November 2024).
- 17 City of Dyersville Water Department, *2024 Consumer Confidence Report*, [https://iowaccr.org/reports/report\\_pdfs/Dyersville/2024%20CCR%20Report.pdf](https://iowaccr.org/reports/report_pdfs/Dyersville/2024%20CCR%20Report.pdf), (accessed 5 November 2024).

- 18 Source Water Protection Tracker - Epworth, <https://programs.iowadnr.gov/sourcewater/SystemDetail?pwsid=3133033>, (accessed 5 November 2024).
- 19 City of Farley Water Department, *2020 Water Quality Report*, [https://cdnsm5-hosted.civiclive.com/UserFiles/Servers/Server\\_15455573/File/Farley%202020%20water%20quality%20report.pdf](https://cdnsm5-hosted.civiclive.com/UserFiles/Servers/Server_15455573/File/Farley%202020%20water%20quality%20report.pdf), (accessed 5 November 2024).
- 20 Source Water Protection Tracker - Farley, <https://programs.iowadnr.gov/sourcewater/SystemDetail?pwsid=3135018>, (accessed 5 November 2024).
- 21 Source Water Protection Tracker - Holy Cross, <https://programs.iowadnr.gov/sourcewater/SystemDetail?pwsid=3146055>, (accessed 5 November 2024).
- 22 Source Water Protection Tracker - Luxemburg, <https://programs.iowadnr.gov/sourcewater/SystemDetail?pwsid=3158001>, (accessed 5 November 2024).
- 23 WATER QUALITY REPORT.
- 24 Source Water Protection Tracker - New Vienna, <https://programs.iowadnr.gov/sourcewater/SystemDetail?pwsid=3165014>, (accessed 5 November 2024).
- 25 Source Water Protection Tracker - Peosta, <https://programs.iowadnr.gov/sourcewater/SystemDetail?pwsid=3170001>, (accessed 5 November 2024).
- 26A. [DNR] Lynam, WATER QUALITY REPORT.
- 27 Source Water Protection Tracker - Worthington, <https://programs.iowadnr.gov/sourcewater/SystemDetail?pwsid=3189001>, (accessed 5 November 2024).
- 28 Worthington Water Supply, *2024 Consumer Confidence Report*, <https://nebula.wsimg.com/d38f339998385bd03489127abd6eb6de?AccessKeyId=A636D15CD5651EA6DDE0&disposition=0&alloworigin=1>, (accessed 5 November 2024).
